# Supplementary material for: Studies of Microbiota Dynamics Reveals Association of “Candidatus Liberibacter Asiaticus” Infection with Citrus (Citrus sinensis) Decline in South of Iran
Source: MDPI journal article supplement (doi:10.3390/ijms19061817), 2018-06-20
Supplement: s1 [file s1]

**Table S1.** Table reporting the primers used in the study, their sequence and source reference.

| Primer | Sequence                        | Reference                          |
|--------|---------------------------------|------------------------------------|
| P1     | 5'-AAGAGTTTGATCCTGGCTCAGGATT-3' | Lee <i>et al.</i> , 1998 [23]      |
| P7     | 5'-CGTCCTTCATCGGCTCTT-3'        | Lee <i>et al.</i> , 1998 [23]      |
| R16F2n | 5'-GAAACGACTGCTAAGACTGG-3'      | Lee <i>et al.</i> , 1998 [23]      |
| R16R2  | 5'-TGACGGGCGGTGTGTACAAACCCCC-3' | Lee <i>et al.</i> , 1998 [23]      |
| FD1    | 5'-AGAGTTTGATCCTGGCTCAG-3'      | Akhtar <i>et al.</i> , 2008 [24]   |
| RP1    | 5'-ACGG(ACT)TACCTTGTTACGACTT-3' | Akhtar <i>et al.</i> , 2008 [24]   |
| OI1    | 5'-TCGGCCGCCCTTCGAAACCCAT-3'    | Jagoueix <i>et al.</i> , 1994 [25] |
| OI2c   | 5'-TCGGCCGCCCTTCGAAACCCAT-3'    | Jagoueix <i>et al.</i> , 1994 [25] |
| V1     | 5'-CCTACGGGAGGCAGCAG-3'         | Muyzer <i>et al.</i> , 1993 [26]   |
| V3     | 5'-ATTACCGCGGCTGCTG-3'          | Muyzer <i>et al.</i> , 1993 [26]   |
